# Supplementary material
Source: publisher figshare collection journal article supplement (https://gsajournals.figshare.com/ndownloader/files/12367037)
Supplement: Supplementary file 1 [file 12367037]

**Table S1.** Designations of genotypes used in the experiment.

| **Population** | **Genotype** | **MA Designation** |
| --- | --- | --- |
|  |  |  |
| Germany | DE-K3-11-12 | G-A |
| Germany | DE-K3-11-13 | G-B |
| Germany | DE-K3-11-24 | G-C |
|  |  |  |
| Israel | IL-M1-2 | I-A |
| Israel | IL-M1-7 | I-B |
| Israel | IL-M1-11 | I-C |
